# Supplementary material for: Diel Vertical Dynamics of Gelatinous Zooplankton (Cnidaria, Ctenophora and Thaliacea) in a Subtropical Stratified Ecosystem (South Brazilian Bight)
Source: PubMed Central journal article supplement (PMC4670095; doi:10.1371/journal.pone.0144161), 2015-12-04
Supplement: pone.0144161.s002.pdf [file pone.0144161.s002.pdf]

**Diel vertical dynamics of gelatinous zooplankton (Cnidaria, Ctenophora and Thaliacea) in a  
subtropical stratified ecosystem (South Brazilian Bight)**

Miodeli Nogueira Júnior\*, Frederico P Brandini & Juan Carlos Ugaz Codina

[\\*miodeli@gmail.com](mailto:*miodeli@gmail.com)

**S1 Table.** Medusae species list with averaged water column integrated density (ind.\*10 m<sup>-3</sup>) and averaged weighted mean depth (m) during diurnal and nocturnal hauls, frequency of capture (FC, %) and relative abundance (RA, %). SD = standard deviation, t = statistic parameter of t test; \* p <0.05, \*\*p<0.01, \*\*\*p<0.001.

| Taxa                                                     | Average density<br>(±SD) |                 | FC   | RA   | Weighted mean depth<br>(±SD) |                 | t      |
|----------------------------------------------------------|--------------------------|-----------------|------|------|------------------------------|-----------------|--------|
|                                                          | Day                      | Night           |      |      | Day                          | Night           |        |
| <b>HYDROZOA</b>                                          |                          |                 |      |      |                              |                 |        |
| <i>Actinula</i> larvae                                   | 0.09<br>(±0.1)           | 0.04<br>(±0.09) | 4.2  | 0.3  | 52.5<br>(±46)                | 85              | -      |
| <b>Anthoathecata</b>                                     |                          |                 |      |      |                              |                 |        |
| <i>Bougainvillia frondosa</i> Mayer, 1900                | 0.09<br>(±0.17)          | 0.04<br>(±0.09) | 4.2  | 0.2  | 20                           | 55              | -      |
| <i>Corymorpha gracilis</i> (Brooks, 1882)                | 1.8<br>(±1.3)            | 2.6<br>(±2.4)   | 41.7 | 7.8  | 51.7<br>(±5.5)               | 31.1<br>(±16.1) | 2.41   |
| <i>Ectopleura dumortierii</i> (van Beneden, 1844)        | 0                        | 0.04<br>(±0.09) | 1.4  | 0.1  | -                            | 55              | -      |
| <i>Zanclaea</i> sp.                                      | 0.09<br>(±0.1)           | 0               | 2.8  | 0.2  | 79<br>(±21.2)                | -               | -      |
| <b>Lepthoathecata</b>                                    |                          |                 |      |      |                              |                 |        |
| <i>Obelia</i> spp.                                       | 0                        | 0.04<br>(±0.09) | 1.4  | 0.1  | -                            | 20              | -      |
| <i>Mitrocomium cirratum</i> Haeckel, 1879                | 0.04<br>(±0.09)          | 0               | 1.4  | 0.1  | 85                           | -               | -      |
| <b>Limnomedusae</b>                                      |                          |                 |      |      |                              |                 |        |
| <i>Proboscidaactyla ornata</i> (McCrary, 1859)           | 0.43<br>(±0.54)          | 0.13<br>(±0.26) | 16.7 | 1.5  | 31.7<br>(±20.2)              | 34              | -      |
| <b>Narcomedusae</b>                                      |                          |                 |      |      |                              |                 |        |
| Bitentaculata larvae                                     | 0.39<br>(±0.5)           | 0.13<br>(±0.09) | 12.5 | 1.0  | 30<br>(±14.1)                | 41.7<br>(±37.5) | 0.4    |
| <i>Cunina octonaria</i> McCrary, 1859                    | 0.22<br>(±0.26)          | 0.13<br>(±0.17) | 8.3  | 0.6  | 37<br>(±4.3)                 | 20              | -      |
| <i>Solmaris corona</i> (Keferstein & Ehlers, 1861)       | 0.3<br>(±0.2)            | 1.57<br>(±1.1)  | 25.0 | 3.2  | 51.4<br>(±28.5)              | 20              | 0.07   |
| <i>Aegina citrea</i> Eschscholtz, 1829                   | 0.09<br>(±0.1)           | 0.04<br>(±0.08) | 2.8  | 0.1  | -                            | 20              | -      |
| <i>Solmundella bitentaculata</i> (Quoy & Gaimard, 1833)  | 0.35<br>(±0.25)          | 0.7<br>(±0.62)  | 22.2 | 2.1  | 73.9<br>(±14.3)              | 38.3<br>(±31.4) | 2.07   |
| <b>Trachymedusae</b>                                     |                          |                 |      |      |                              |                 |        |
| <i>Aglaura hemistoma</i> Péron & Lesueur, 1810           | 24.1<br>(±27)            | 8.8<br>(±3.5)   | 79.2 | 69.1 | 57.9<br>(±9.1)               | 27.2<br>(±4)    | 6.2*** |
| <i>Liriope tetraphylla</i> (Chamisso & Eysenhardt, 1821) | 1.9<br>(±2)              | 2.2<br>(±1.3)   | 52.8 | 8.0  | 54<br>(±8.2)                 | 31.7<br>(±5.9)  | 4.38** |
| <i>Rhopalonema velatum</i> Gegenbaur, 1857               | 0.3<br>(±0.39)           | 0.09<br>(±0.1)  | 11.1 | 0.84 | 69.2<br>(±15.1)              | 20              | -      |
| Rhopalonematidae sp.1 ( <i>Arctapodema</i> ?)            | 1.6<br>(±1.4)            | 0.4<br>(±0.46)  | 20.8 | 3.5  | 25.6<br>(±4.9)               | 20              | 0.07   |
| <b>SCYPHOZOA</b>                                         |                          |                 |      |      |                              |                 |        |
| <b>Coronatae</b>                                         |                          |                 |      |      |                              |                 |        |
| <i>Nausithoe aurea</i> Silveira & Morandini, 1997        | 0.22<br>(±0.26)          | 0.13<br>(±0.17) | 9.7  | 0.7  | 65.2<br>(±27.9)              | 20              | -      |
| <i>Nausithoe punctata</i> Kölliker, 1853                 | 0.09<br>(±0.1)           | 0.04<br>(±0.09) | 4.2  | 0.3  | 70.5<br>(±21.9)              | 20              | -      |
