# Supplementary material for: Diel Vertical Dynamics of Gelatinous Zooplankton (Cnidaria, Ctenophora and Thaliacea) in a Subtropical Stratified Ecosystem (South Brazilian Bight)
Source: PubMed Central journal article supplement (PMC4670095; doi:10.1371/journal.pone.0144161), 2015-12-04
Supplement: pone.0144161.s003.pdf [file pone.0144161.s003.pdf]

**Diel vertical dynamics of gelatinous zooplankton (Cnidaria, Ctenophora and Thaliacea) in a  
subtropical stratified ecosystem (South Brazilian Bight)**

Miodeli Nogueira Júnior\*, Frederico P Brandini & Juan Carlos Ugaz Codina

[\\*miodeli@gmail.com](mailto:*miodeli@gmail.com)

**S2 Table.** Siphonophores species list and summary of the catches. DS = developmental stages; P = polygastric, E = eudoxid. Other legends as in S1 Table.

| Taxa                                                | DS       | Average density<br>(±SD) |                 | FC          | RA          | Weighted mean depth<br>(±SD) |                 | t      |
|-----------------------------------------------------|----------|--------------------------|-----------------|-------------|-------------|------------------------------|-----------------|--------|
|                                                     |          | Day                      | Night           |             |             | Day                          | Night           |        |
| <b>SIPHONOPHORAE</b>                                |          |                          |                 |             |             |                              |                 |        |
| Destroyed, unidentified                             |          | 0.4<br>(±0.6)            | 0.4<br>(±0.6)   | <b>16.7</b> | <b>1.5</b>  |                              |                 |        |
| <b>Physonectae</b>                                  |          |                          |                 |             |             |                              |                 |        |
| Athorybia larvae                                    |          | 0.17<br>(±0.14)          | 0.26<br>(±0.22) | <b>13.9</b> | <b>0.86</b> | 48.3<br>(±33.3)              | 19.9<br>(±17.6) | 0.55   |
| <i>Agalma elegans</i> (Sars, 1846)                  |          | 0.04<br>(±0.09)          | 0               | <b>1.4</b>  | <b>0.08</b> | 20                           | -               | -      |
| <i>Agalma okeni</i> Eschscholtzi, 1829              |          | 0                        | 0.04<br>(±0.09) | <b>1.4</b>  | <b>0.08</b> | -                            | 55              | -      |
| <i>Cordagalma ordinatum</i> (Haeckel, 1888)         |          | 0.35<br>(±0.3)           | 0.5<br>(±0.36)  | <b>25</b>   | <b>1.6</b>  | 66.7<br>(±15.8)              | 42.2<br>(±15.4) | 2.06   |
| <i>Nanomia bijuga</i> (Delle Chiaje, 1841)          |          | 0.35<br>(±0.3)           | 0.4<br>(±0.3)   | <b>22.2</b> | <b>1.6</b>  | 61.9<br>(±7.6)               | 53.8<br>(±29.2) | 0.47   |
| <i>Physophora hydrostatica</i> Forskål, 1775        |          | 0.09<br>(±0.1)           | 0.13<br>(±0.09) | <b>6.9</b>  | <b>0.4</b>  | 55                           | 75<br>(±17.3)   | 0.21   |
| <b>Calycophorae</b>                                 |          |                          |                 |             |             |                              |                 |        |
| <i>Amphicaryon acaule</i> Chun, 1888                | <b>P</b> | 0.04<br>(±0.09)          | 0               | <b>1.4</b>  | <b>0.08</b> | 85                           | -               | -      |
| <i>Chelophyes appendiculata</i> (Eschscholtz, 1829) | <b>P</b> | 0.17<br>(±0.25)          | 0.26<br>(±0.3)  | <b>13.9</b> | <b>0.86</b> | 42.8<br>(±32.2)              | 43.9<br>(±20.7) | 0.05   |
|                                                     | <b>E</b> | 0.7<br>(±0.26)           | 0.4<br>(±0.46)  | <b>22.2</b> | <b>2.32</b> | 26.8<br>(±9.4)               | 22.5<br>(±4.2)  | 0.73   |
| <i>Diphyes bojani</i> (Eschscholtz, 1825)           | <b>P</b> | 2.9<br>(±1.7)            | 1.6<br>(±0.5)   | <b>54.2</b> | <b>8.9</b>  | 43.4<br>(±7.3)               | 24.3<br>(±8.7)  | 3.3*   |
|                                                     | <b>E</b> | 6.8<br>(±4.4)            | 3.7<br>(±1.4)   | <b>52.8</b> | <b>20.8</b> | 39.8<br>(±7.1)               | 21.3<br>(±1.7)  | 5.1**  |
| <i>Diphyes dispar</i> Chamisso & Eysenhardt, 1821   | <b>P</b> | 0.04<br>(±0.09)          | 0.04<br>(±0.09) | <b>2.8</b>  | <b>0.17</b> | 20                           | 20              | -      |
|                                                     | <b>E</b> | 0.09<br>(±0.1)           | 0.26<br>(±0.2)  | <b>9.7</b>  | <b>0.69</b> | 37.5<br>(±24.7)              | 32.8<br>(±22.2) | 0.22   |
|                                                     | <b>A</b> | 0.13<br>(±0.17)          | 0.3<br>(±0.26)  | <b>9.7</b>  | <b>0.86</b> | 37.5<br>(±24.7)              | 29.1<br>(±15.8) | 0.45   |
| <i>Eudoxoides mitra</i> (Huxley, 1859)              | <b>P</b> | 0<br>(±0.09)             | 0.04<br>(±0.09) | <b>1.4</b>  | <b>0.08</b> | -                            | 20              | -      |
|                                                     | <b>E</b> | 0.2<br>(±0.2)            | 0               | <b>6.9</b>  | <b>0.43</b> | 35.2<br>(±26.3)              | -               | -      |
| <i>Eudoxoides spiralis</i> (Bigelow, 1911)          | <b>P</b> | 0                        | 0.1<br>(±0.26)  | <b>2.8</b>  | <b>0.26</b> | -                            | 20              | -      |
|                                                     | <b>E</b> | 0.6<br>(±0.36)           | 0.4<br>(±0.8)   | <b>12.7</b> | <b>1.89</b> | 27<br>(±8.1)                 | 20              | -      |
| <i>Lensia subtilis</i> (Chun, 1886)                 | <b>P</b> | 0.09<br>(±0.1)           | 0.2<br>(±0.17)  | <b>8.3</b>  | <b>0.6</b>  | 52.5<br>(±45.9)              | 32.8<br>(±22.2) | 0.67   |
|                                                     | <b>E</b> | 0.5<br>(±0.5)            | 0.1<br>(±0.17)  | <b>18</b>   | <b>1.29</b> | 42.71<br>(±26.2)             | 20              | 0.31   |
| <i>Lensia</i> sp.                                   | <b>E</b> | 0.17<br>(±0.14)          | 0.04<br>(±0.09) | <b>6.9</b>  | <b>0.43</b> | 31.7<br>(±20)                | 20              | -      |
| <i>Muggiaea kochii</i> (Will, 1844)                 | <b>P</b> | 0.5<br>(±0.4)            | 0.7<br>(±0.4)   | <b>20.8</b> | <b>2.41</b> | 39.1<br>(±11.8)              | 21.8<br>(±3.7)  | 2.79*  |
|                                                     | <b>E</b> | 0.2<br>(±0.2)            | 0.26<br>(±0.2)  | <b>11.1</b> | <b>0.95</b> | 50.2<br>(±6.7)               | 20              | 8.34** |
| <i>Sphaeronectes koellikeri</i> Huxley, 1859        | <b>E</b> | 0.09<br>(±0.1)           | 0.04<br>(±0.09) | <b>4.2</b>  | <b>0.26</b> | 52.5<br>(±46)                | 85              | -      |

**S2 Table.** Continued

| Taxa                                            | DS       | Mean density<br>(±SD) |                | FC          | RA           | Weighted mean depth<br>(±SD) |                 |       |
|-------------------------------------------------|----------|-----------------------|----------------|-------------|--------------|------------------------------|-----------------|-------|
|                                                 |          | Day                   | Night          |             |              | Day                          | Night           | t     |
| <i>Abylopsis tetragona</i> (Otto, 1823)         | <b>P</b> | 2<br>(±1.5)           | 3.3<br>(±0.5)  | <b>56.9</b> | <b>19.67</b> | 39<br>(±7.1)                 | 27.2<br>(±4.2)  | 2.86* |
|                                                 | <b>E</b> | 3.6<br>(±0.9)         | 7.9<br>(±1.5)  | <b>72.2</b> | <b>22.8</b>  | 64<br>(±5.7)                 | 28.6<br>(±2.9)  | 11*** |
| <i>Abylopsis eschscholtzii</i> (Huxley, 1859)   | <b>P</b> | 0.7<br>(±0.3)         | 0.6<br>(±0.3)  | <b>26.4</b> | <b>2.58</b>  | 36.7<br>(±7.2)               | 21.8<br>(±3.7)  | 3.66* |
|                                                 | <b>E</b> | 0.7<br>(±0.4)         | 1.3<br>(±0.2)  | <b>26.4</b> | <b>3.96</b>  | 25<br>(±10)                  | 22.9<br>(±5.8)  | 0.36  |
| <i>Bassia bassensis</i> (Quoy & Gaimard, 1833)  | <b>P</b> | 0.09<br>(±0.1)        | 0.1<br>(±0.08) | <b>6.9</b>  | <b>0.43</b>  | 37.5<br>(±24.8)              | 20              | 1.34  |
|                                                 | <b>E</b> | 0.35<br>(±0.2)        | 0.26<br>(±0.2) | <b>15.3</b> | <b>1.2</b>   | 33.7<br>(±17)                | 20              | 1.37  |
| <i>Enneagonum hyalinum</i> Quoy & Gaimard, 1827 | <b>P</b> | 1.3<br>(±0.6)         | 1.3<br>(±1)    | <b>37.5</b> | <b>5.33</b>  | 31.9<br>(±8.9)               | 26.2<br>(±7.3)  | 0.98  |
|                                                 | <b>E</b> | 0.5<br>(±0.4)         | 1.1<br>(±0.1)  | <b>30.5</b> | <b>3.35</b>  | 31.5<br>(±10)                | 29.6<br>(±12.5) | 0.22  |
