# Supplementary material for: Diel Vertical Dynamics of Gelatinous Zooplankton (Cnidaria, Ctenophora and Thaliacea) in a Subtropical Stratified Ecosystem (South Brazilian Bight)
Source: PubMed Central journal article supplement (PMC4670095; doi:10.1371/journal.pone.0144161), 2015-12-04
Supplement: pone.0144161.s004.pdf [file pone.0144161.s004.pdf]

**Diel vertical dynamics of gelatinous zooplankton (Cnidaria, Ctenophora and Thaliacea) in a  
subtropical stratified ecosystem (South Brazilian Bight)**

Miodeli Nogueira Júnior\*, Frederico P Brandini & Juan Carlos Ugaz Codina

[\\*miodeli@gmail.com](mailto:miodeli@gmail.com)

**S3 Table.** Ctenophores species list and summary of the catches. Legends as in S1 Table.

| Taxa                                  | Average density<br>(±SD) |                 | FC    | RA   | Weighted mean depth<br>(±SD) |                 | t     |
|---------------------------------------|--------------------------|-----------------|-------|------|------------------------------|-----------------|-------|
|                                       | Day                      | Night           |       |      | Day                          | Night           |       |
| <b>CTENOPHORA</b>                     |                          |                 |       |      |                              |                 |       |
| <b>Beroidea</b>                       |                          |                 |       |      |                              |                 |       |
| <i>Beroe</i> sp.                      | 0.6<br>(±0.3)            | 1.5<br>(±0.8)   | 29.17 | 92.1 | 70.45<br>(±12.9)             | 35.5<br>(±23.7) | 1.76* |
| <b>Lobatae</b>                        |                          |                 |       |      |                              |                 |       |
| Destroyed unidentified                | 0.04<br>(±0.09)          | -               | 1.39  | 1.97 | 55                           | -               |       |
| <b>Cestida</b>                        |                          |                 |       |      |                              |                 |       |
| <i>Velamen parallelum</i> (Fol. 1869) | 0                        | 0.13<br>(±0.17) | 4.17  | 5.88 | -                            | 20              |       |
