# Supplementary material for: Diel Vertical Dynamics of Gelatinous Zooplankton (Cnidaria, Ctenophora and Thaliacea) in a Subtropical Stratified Ecosystem (South Brazilian Bight)
Source: PubMed Central journal article supplement (PMC4670095; doi:10.1371/journal.pone.0144161), 2015-12-04
Supplement: pone.0144161.s005.pdf [file pone.0144161.s005.pdf]

**Diel vertical dynamics of gelatinous zooplankton (Cnidaria, Ctenophora and Thaliacea) in a  
subtropical stratified ecosystem (South Brazilian Bight)**

Miodeli Nogueira Júnior\*, Frederico P Brandini & Juan Carlos Ugaz Codina

[\\*miodeli@gmail.com](mailto:*miodeli@gmail.com)

**S4 Table.** Thaliaceans species list and summary of the catches. DS = developmental stage; B = blastozooids (aggregates); O = oozoids (solitary), P = phorozoids; G = gonozooids; N = nurses; A = all stages combined. Other legends as in S1 Table.

| Taxa                                                             | DS       | Average density<br>(±SD) |                 | FC    | RA    | Weighted mean depth<br>(±SD) |                 | t      |
|------------------------------------------------------------------|----------|--------------------------|-----------------|-------|-------|------------------------------|-----------------|--------|
|                                                                  |          | Day                      | Night           |       |       | Day                          | Night           |        |
| <b>THALIACEA</b>                                                 |          |                          |                 |       |       |                              |                 |        |
| <b>Salpida</b>                                                   |          |                          |                 |       |       |                              |                 |        |
| <i>Cyclosalpa</i> spp. ( <i>C. bakeri</i> and <i>C. polae</i> ?) | <b>B</b> | 0.26<br>(±0.33)          | 0.09<br>(±0.1)  | 8.33  | 0.33  | 77.8<br>(±10.1)              | 20              |        |
|                                                                  | <b>O</b> | 0                        | 0.04<br>(±0.09) | 1.39  | 0.04  | -                            | 20              |        |
| (?) <i>Ritteriella amboinensis</i> (Apstein, 1904)               | <b>O</b> | 0                        | 0.04<br>(±0.09) | 1.39  | 0.04  | -                            | 55              |        |
| <i>Salpa fusiformis</i> Cuvier, 1804                             | <b>B</b> | 3.44<br>(±3.6)           | 2.13<br>(±1.8)  | 41.67 | 5.38  | 56.8<br>(±16.8)              | 27.5<br>(±9.8)  | 2.93*  |
|                                                                  | <b>O</b> | 1.48<br>(±1.8)           | 0.74<br>(±0.41) | 34.72 | 2.13  | 51.7<br>(±21.7)              | 44.3<br>(±13.3) | 0.58   |
| <i>Thalia democratica</i> (Forskål, 1775)                        | <b>B</b> | 15.15<br>(±17.9)         | 7<br>(±2.9)     | 66.67 | 21.23 | 50.9<br>(±10.4)              | 22.2<br>(±3.8)  | 5.17** |
|                                                                  | <b>O</b> | 1.48<br>(±1.6)           | 0.17<br>(±0.14) | 26.39 | 1.58  | 54.06<br>(±17.7)             | 41.7<br>(±37.5) | 0.59   |
| <b>Doliolida</b>                                                 |          |                          |                 |       |       |                              |                 |        |
| <i>Doliolletta gegenbauri</i> (Uljanin, 1884)                    | <b>P</b> | 7.53<br>(±9.7)           | 2.6<br>(±1.28)  | 61.11 | 9.92  | 44.7<br>(±17.1)              | 36.1<br>(±0.9)  | 1      |
|                                                                  | <b>G</b> | 1.22<br>(±1)             | 0.48<br>(±0.26) | 33.33 | 1.67  | 44.5<br>(±18.7)              | 22.7<br>(±5.4)  | 2.2    |
|                                                                  | <b>N</b> | 2.52<br>(1.18)           | 2.48<br>(±1.3)  | 64.28 | 4.9   | 43.5<br>(±5.9)               | 30.7<br>(±2.3)  | 4**    |
| <i>Doliolum nationalis</i> Borgert, 1893                         | <b>P</b> | 10.14<br>(±10.8)         | 3.22<br>(±3.05) | 56.94 | 12.8  | 41<br>(±12.4)                | 32<br>(±5.2)    | 1.34   |
|                                                                  | <b>G</b> | 23.46<br>(±24.1)         | 12<br>(±9.8)    | 61.11 | 33.99 | 29.9<br>(±3.6)               | 21.9<br>(±0.6)  | 4.38** |
|                                                                  | <b>N</b> | 3.39<br>(±2.06)          | 1.87<br>(±1.13) | 55.55 | 5.04  | 45.1<br>(±9.9)               | 23.4<br>(±4.3)  | 4.03** |
| Destroyed, unidentified                                          |          |                          |                 | 5.55  | 0.54  |                              |                 |        |
| <b>Pirossomatida</b>                                             |          |                          |                 |       |       |                              |                 |        |
| (?) <i>Pyrossomella verticillata</i> (Neumann, 1909)             |          | 0.09<br>(±0.1)           | 0.09<br>(±0.1)  | 5.55  | 0.17  | 67.5<br>(±17.7)              | 20              |        |
